# Supplementary material
Source: Springer Nature journal article supplement (https://www.springermedizin.de/resource/supplementary/12916_2009_214_MOESM10_ESM.pdf/9599408)
Supplement: MOESM10 [file 9599408]

**Id, Sex, Study name**

**Relative Risk  
95% CI**

**Relative Risk  
95% CI**

**USA**  
8 M Dunham et al 1968

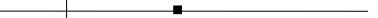

2.57 (0.52, 12.54)

9 F Dunham et al 1968

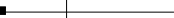

0.58 (0.14, 2.45)

12 M Williams and Horm 1977

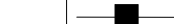

1.67 (1.09, 2.55)

21 M Hartge et al 1985

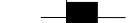

1.14 (0.80, 1.61)

22 F Kabat et al 1986

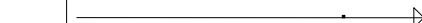

10.40 (1.07, 101.46)

27 M Slattery et al 1988

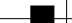

0.82 (0.52, 1.29)

**Subtotal (95% CI)**

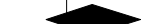

1.24 (0.83, 1.85)

**SCANDINAVIA**

3 M Norway cohorts

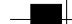

0.83 (0.62, 1.11)

4 M Lockwood 1961

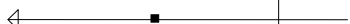

0.35 (0.07, 1.77)

**Subtotal (95% CI)**

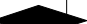

0.79 (0.53, 1.18)

**OTHER**

17 M Howe et al 1980

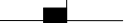

0.90 (0.50, 1.60)

31 M Burch et al 1989

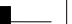

0.54 (0.34, 0.87)

**Subtotal (95% CI)**

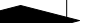

0.68 (0.41, 1.11)

**Total (95% CI)**

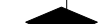

0.95 (0.71, 1.29)

0.10 0.20 1.00 10.00 20.00
